# Supplementary material
Source: publisher figshare collection journal article supplement (https://gsajournals.figshare.com/ndownloader/files/14218004)
Supplement: Supplementary file 1 [file 14218004]

Archive with 1 entries (1 files):
- 14218004.out
